# Supplementary material for: Biomimetic scaffolds with programmable pore structures for minimum invasive bone repair
Source: Royal Society of Chemistry journal article supplement (doi:10.1039/d1nr04124j), 2021-01-01
Supplement: d1nr04124j1.pdf [file d1nr04124j1.pdf]

Supporting Information

**Biomimetic Scaffolds with Programmable Pore Structures for Minimum Invasive Bone Repair**

Li Wang<sup>1,2\*</sup>, Xiyang Zeng<sup>1</sup>, Guilong Yan<sup>1</sup>, Xiaohu Chen<sup>1</sup>, Kun Luo<sup>1</sup>, Junfeng Li<sup>1</sup>, Tuck-Whye Wong<sup>3</sup>

<sup>1</sup> College of Materials, Chemistry & Chemical Engineering, Chengdu University of Technology, Chengdu 610059, Sichuan, P. R. China

<sup>2</sup> College of Materials, Chemistry, Sichuan University, Chengdu 610064, Sichuan, P. R. China

<sup>3</sup> Advanced Membrane Technology Centre, Universiti Teknologi Malaysia, 81310, Johor, Malaysia.

\*Corresponding author, E-mail addresses: [wangli18@cdut.edu.cn](mailto:wangli18@cdut.edu.cn)

Supplemental table: Table S1

Supplemental Fig.s: Fig. S1 Fig. S13

Supplemental videos: Movie S1 Movie S2

**Table S1.** Enthalpies of porous composite scaffolds.

| <b>Samples</b> | <b><math>T_c</math></b> | <b>Onset</b>       | <b>Offset</b>      | <b><math>T_m</math></b> | <b><math>\Delta H</math></b> |
|----------------|-------------------------|--------------------|--------------------|-------------------------|------------------------------|
|                | <b>(°C)</b>             | <b>Temperature</b> | <b>Temperature</b> | <b>(°C)</b>             | <b>(J·g<sup>-1</sup>)</b>    |
|                |                         | <b>(°C)</b>        | <b>(°C)</b>        |                         | <b><sup>b</sup></b>          |
| PCT            | -19.46                  | -12.15             | 34.14              | 18.6                    | -12.15                       |
| PCTHA10        | -26.04                  | -1.09              | 44.86              | 23.68                   | -24.80                       |
| PCTHA20        | -26.12                  | 1.41               | 23.68              | 21.77                   | -25.13                       |
| PCTHA30        | -22.12                  | -12.36             | 34.98              | 17.12                   | -14.66                       |
| PCTHA40        | -26.45                  | -23.37             | 21.27              | 3.77                    | -7.27                        |

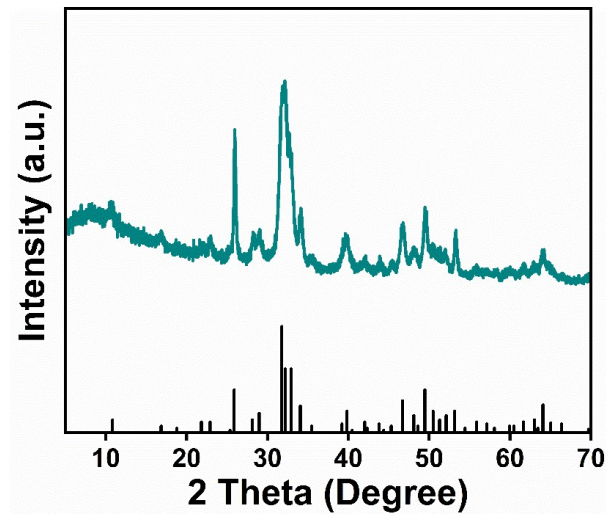

**Fig. S1.** XRD pattern of HA.

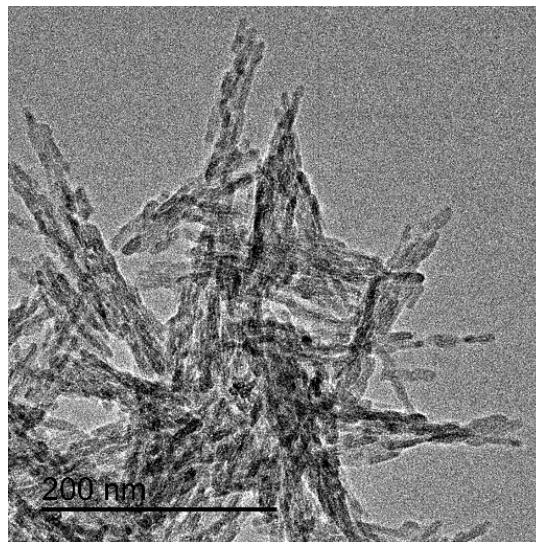

**Fig. S2.** TEM image of HA powder.

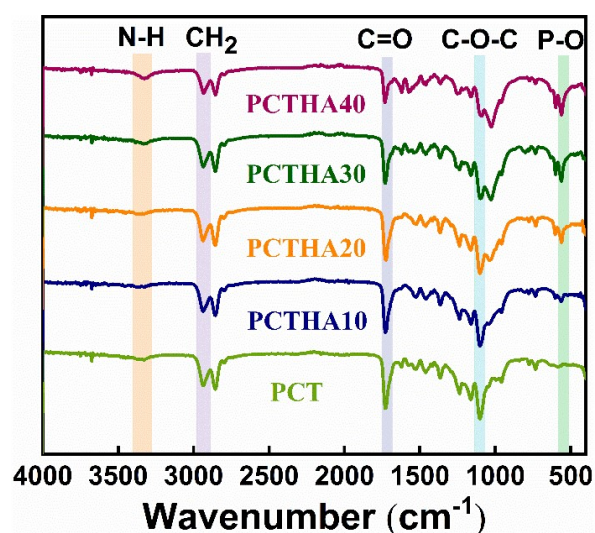

**Fig. S3.** Characterization of PCTHAx by FT-IR. All composite scaffolds present characteristic peaks in common including N-H stretching at 3332 cm<sup>-1</sup>, asymmetric C-H stretching at 2936 cm<sup>-1</sup>, symmetric C-H stretching at 2860 cm<sup>-1</sup>, C=O stretching at 1725 cm<sup>-1</sup>, C-O-C group at 1100 cm<sup>-1</sup>, P-O bond absorption peaks at 1028 cm<sup>-1</sup> and 562 cm<sup>-1</sup>. The formation of polyurethane was confirmed by the characteristic absorption peak of C-N at 1462 cm<sup>-1</sup>, while there was no obvious characteristic absorption peak at 2260-2280 cm<sup>-1</sup>, indicating that HDI reacted adequately with the matrix material.

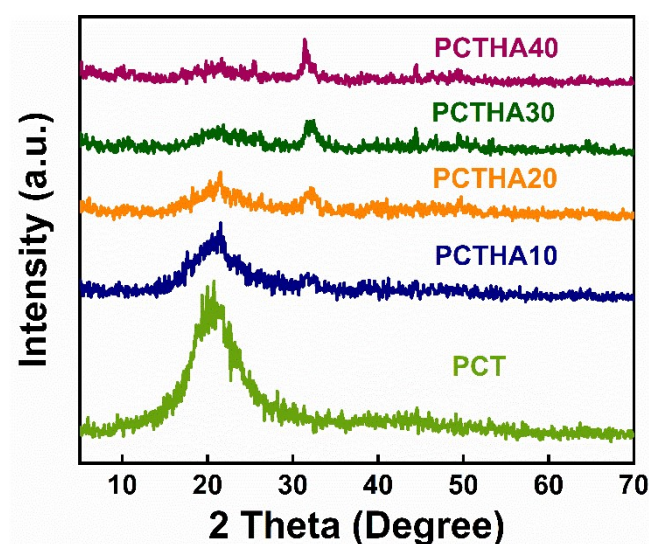

**Fig. S4.** XRD patterns of PCTHAx. The composite scaffold has only one amorphous peak around 20° and the main peak of HA was gradually revealed at 32°.

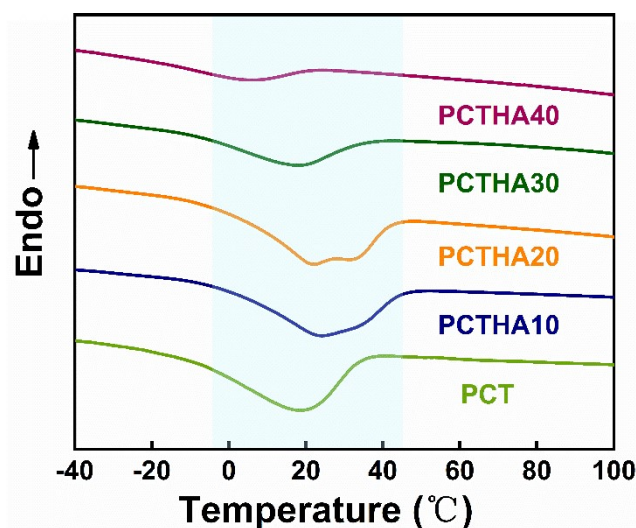

**Fig. S5.** The second heating curve of PCTHAx. The melting temperature of PCTHA10 increased from 18.61 °C to 23.68 °C compared to pure PCT, on the one hand because the presence of HA limited the micro-Brownian motion of the polymer molecular chains, and on the other hand because the physical interaction between HA and the matrix material provided a higher thermal transition temperature for the polymer. While the melting temperature of PCTHA20, PCTHA30 and PCTHA40 gradually decreased from 21.77 °C to 17.12 °C and finally to 3.77 °C. This was due to the high HA content, which reduced the crystallization of the composites and led to a lower melting temperature.

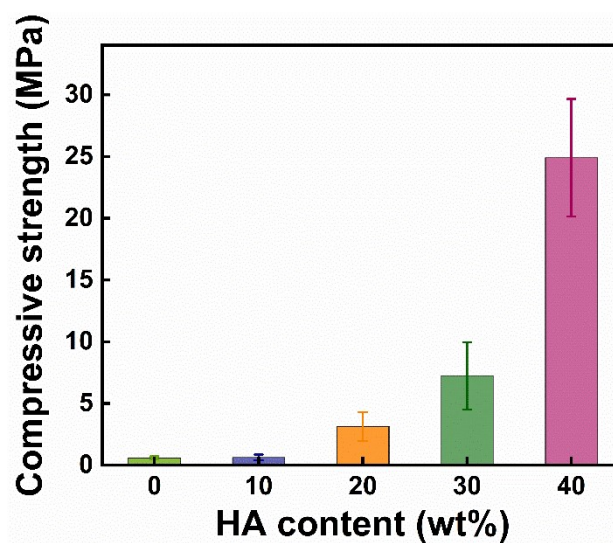

**Fig. S6.** Compressive strength of the PCTHAx. Dispersion and adhesion between HA and matrix material resulted in a gradual increase in the compressive strength of the

composite scaffold.

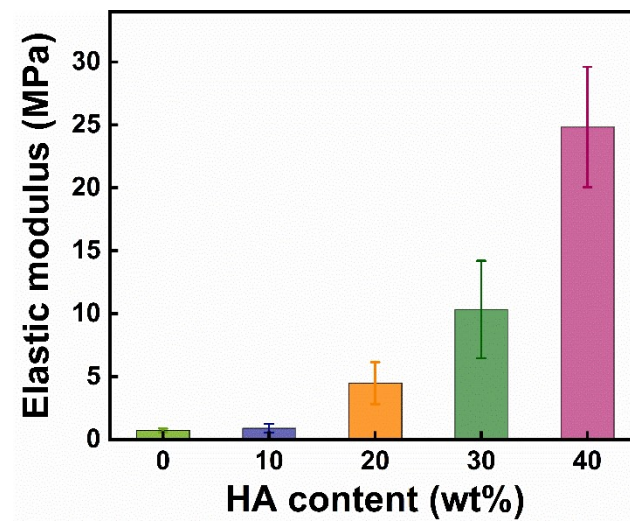

**Fig. S7.** Elastic modulus of the PCTHAx.

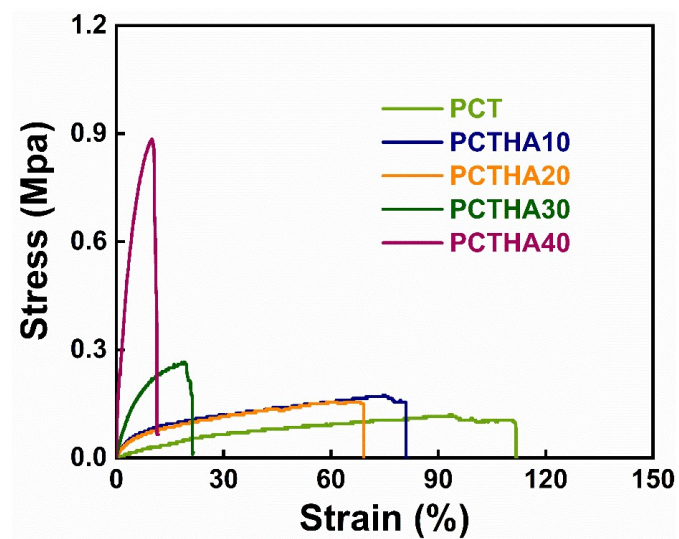

**Fig. S8.** Stress-strain curves for PCTHAx scaffolds.



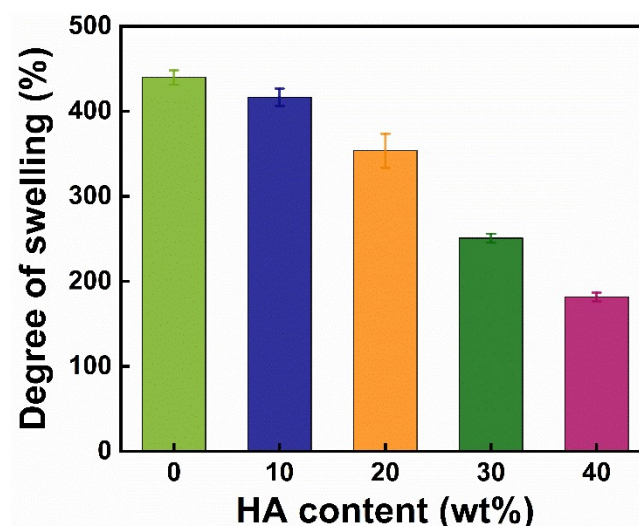

**Fig. S9.** Swelling degree of PCTHAX. The swelling of PCT, PCTHA10, PCTHA20, PCTHA30 and PCTHA40 after 24 hours of immersion in ethyl acetate was 439.7%, 416.6%, 353.6%, 250.8% and 181.8% respectively. The decrease in swelling with increasing HA was caused by the tight junctions between HA and the molecular chains.

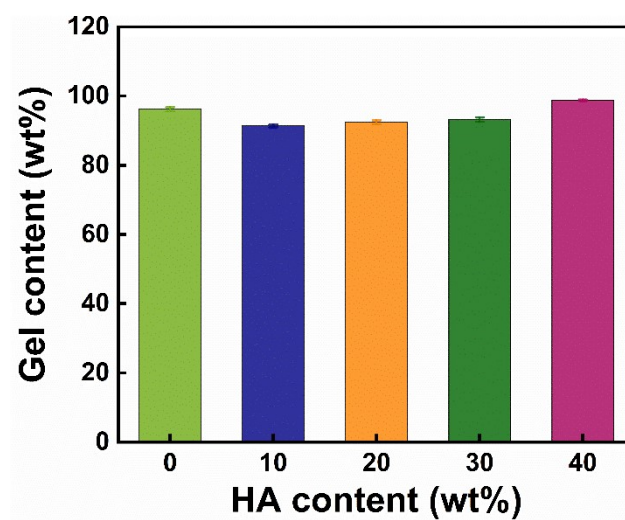

**Fig. S10.** Gel content of PCTHAX.

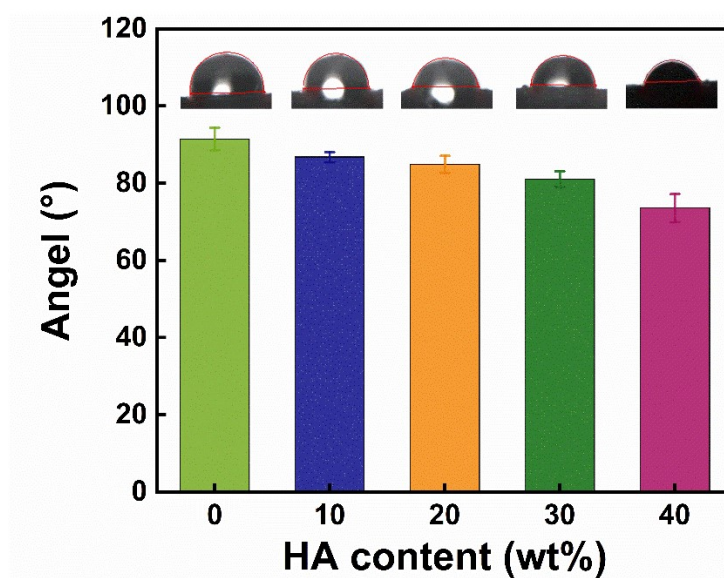

**Fig. S11.** Water contact angles of PCTHAx.

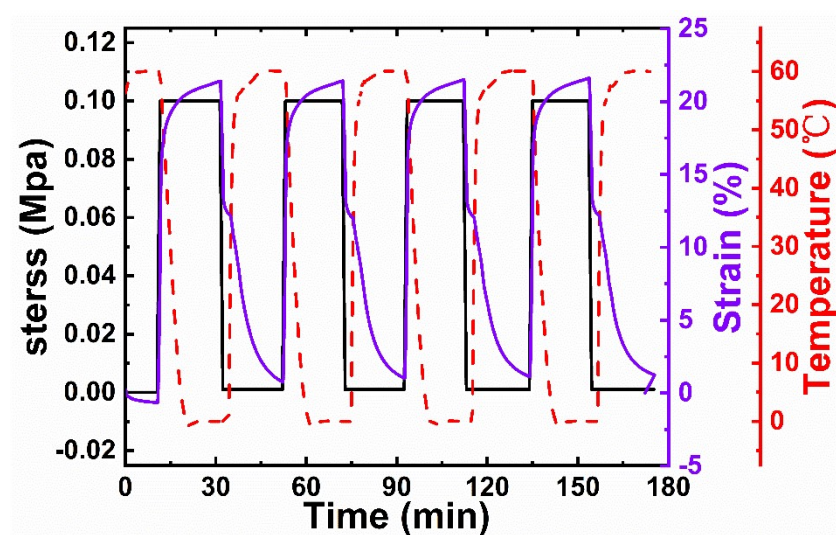

**Fig. S12.** Shape memory performance of PCTHA20 in the 2nd to 5th cycles (black solid line: stress; violet solid line: strain; red dashed line: temperature).

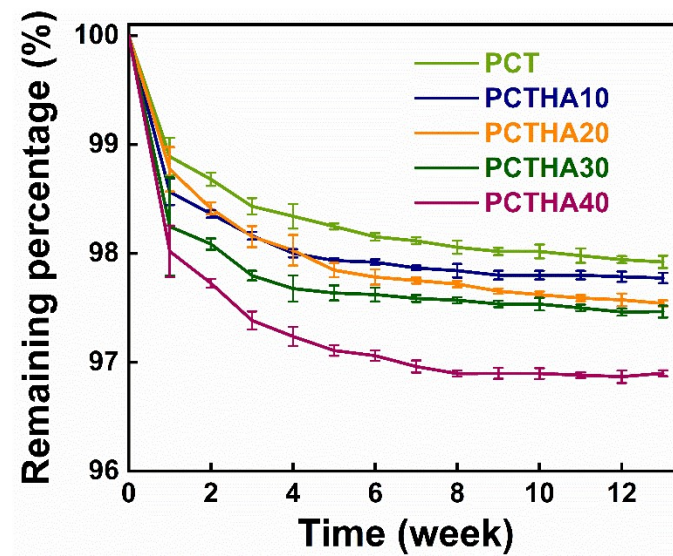

**Fig. S13.** The PCTHAx composite scaffold was tested for mass loss at different time intervals in PBS at 37°C.



### **Supporting videos**

**Movie S1.** Compression recovery experiment of PCTHA20.

**Movie S2.** Bending experiments of PCTHAx with different HA content.
